# Supplementary material for: Impact of alloying and lattice strain on ORR activity of Pt and Pd based ternary alloys with Fe and Co for proton exchange membrane fuel cell applications
Source: Royal Society of Chemistry journal article supplement (doi:10.1039/c3ra47021k), 2014-01-01
Supplement: c3ra47021k1.pdf [file c3ra47021k1.pdf]

## Supporting Information

Impact of alloying and lattice strain on ORR activity of Pt and Pd based ternary alloys with Fe and Co for Proton Exchange Membrane Fuel cell applications.

**Karuppannan Mohanraju, Louis Cindrella\***

\*Corresponding Author: Prof. L. Cindrella, Email: [cind@nitt.edu](mailto:cind@nitt.edu)

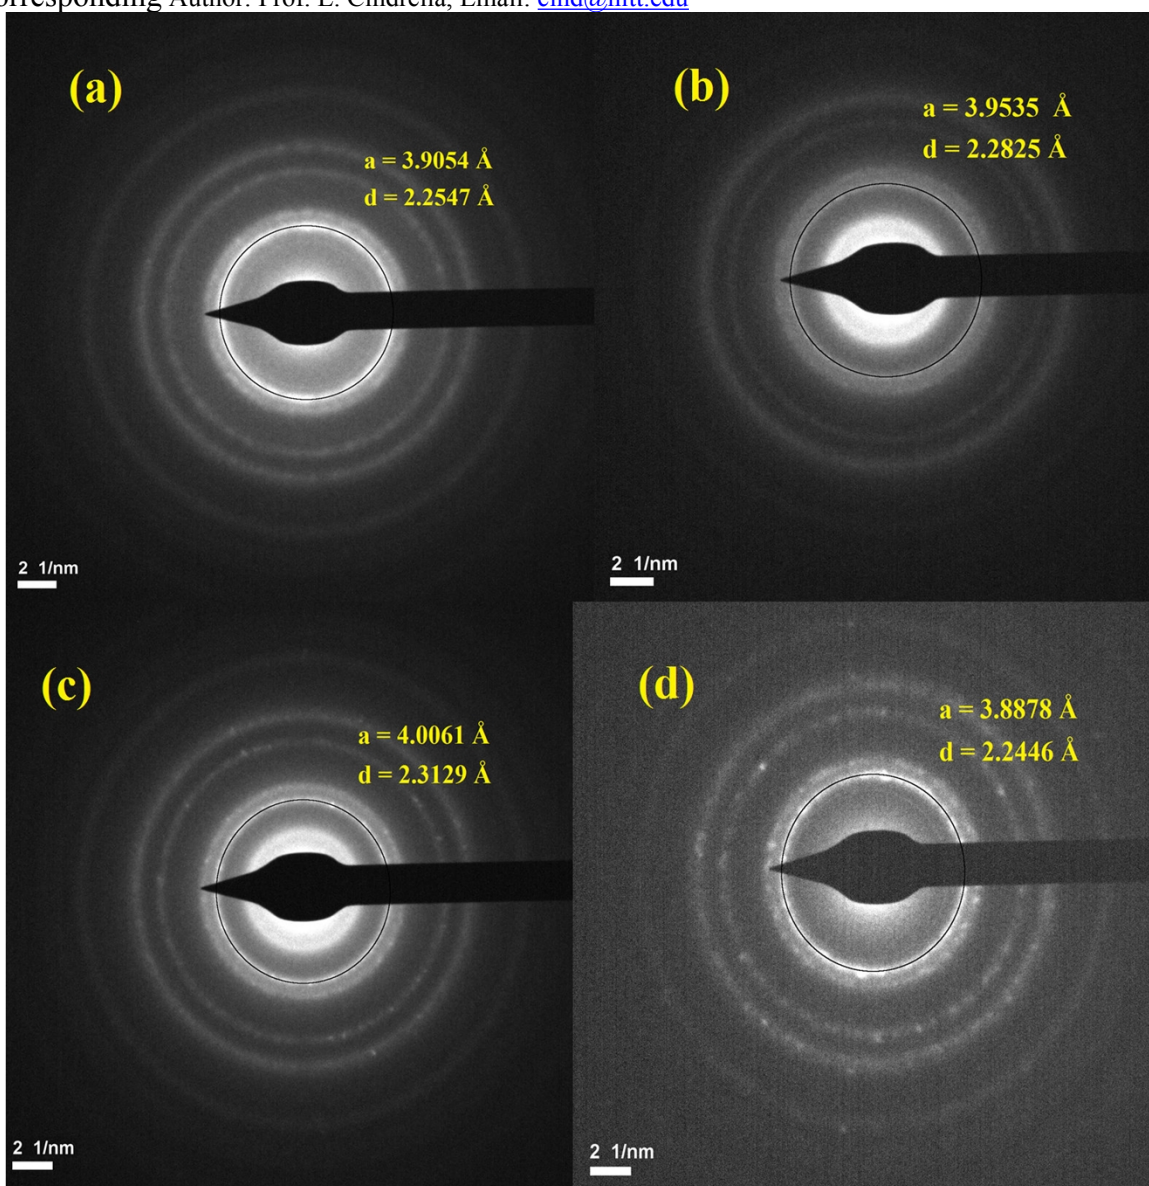

Fig. S1 Selected area electron diffraction patterns (SAED) of (a) Pt/C, (b) PtFeCo/C, (c) Pd/C and (d) PdFeCo/C.

For all the four catalysts, the SAED pattern of (111) planes are exactly fitted with a circle (black), and from the diameter of the (111) planar ring, lattice constant and inter planar distance have been calculated and included in the images.
